# Supplementary material
Source: Springer Nature journal article supplement (https://www.springermedizin.de/resource/supplementary/13601_2012_283_MOESM2_ESM.pdf/9677820)

Current asthma prevalence (%; 95%CI)

**18-65 yrs**

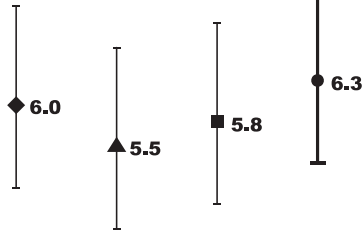

**>65 yrs**

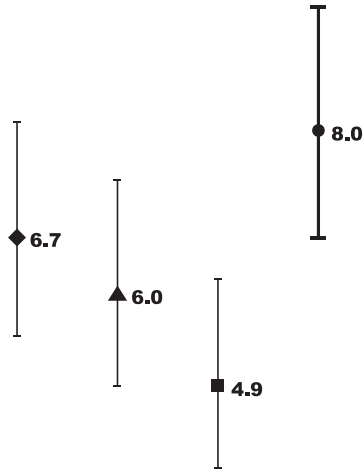

**All Adults**

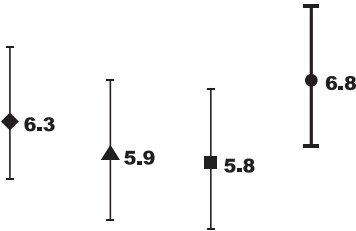

Supplement: MOESM2 [file 9677820]
